# Supplementary material
Source: PubMed Central journal article supplement (PMC3781412)
Supplement: supp_113.205245_JPET205245__supplemental_data.pdf [file supp_113.205245_JPET205245__supplemental_data.pdf]

Largent-Milnes et al. JPET #205245 Supplemental Files

Manuscript: Journal of Pharmacology and Experimental Therapeutics # 205245

Title: Building a Better Analgesic: Multifunctional Compounds that Address Injury-induced Pathology to Enhance Analgesic Efficacy while Eliminating Unwanted Side Effects

TM Largent-Milnes, SW Brookshire, DP Skinner Jr., KE Hanlon, D Giuvelis, T Yamamoto, P Davis, CR Campos, P Nair, S Deekonda, EJ Bilsky, F Porreca, VJ Hraby, TW Vanderah

Supplemental Figure 1

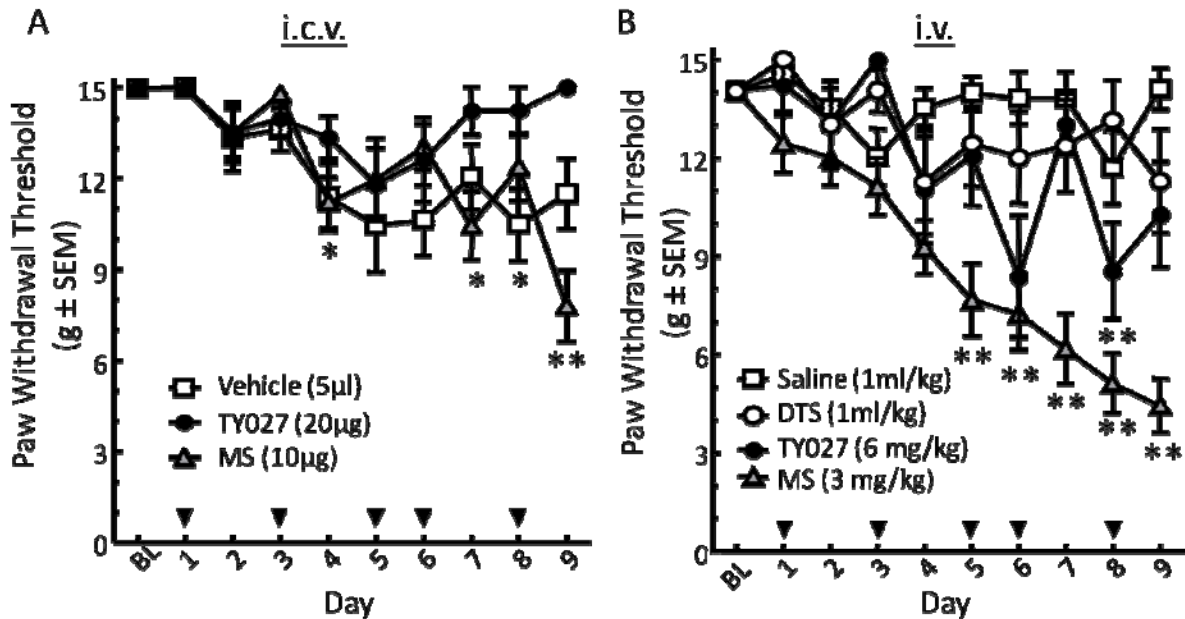

Supplemental Figure 1: Paradoxical allodynia develops after supraspinal and systemic administrations of morphine but not TY027. Non-injured rats injected with TY027 (*i.c.v.* and *i.v.*) were assessed for the development of compound-induced tactile allodynia 75 - 90 min after exposure/CPP evaluation. (A) Supraspinal (*i.c.v.*) administration: MS resulted in significant allodynia compared to baseline values beginning after the five exposures ( $*p \leq 0.05$ ). Supraspinal TY027 exposed animals did not show significant decreases in paw withdrawal thresholds ( $p = 0.11$ ) (B) Systemic (*i.v.*) administration of morphine (MS, 3 mg/kg) induced significant tactile allodynia after the second exposure that continued to decrease until the final assessment on day 9 ( $*p \leq 0.05$ ). TY027-treated rats showed a delayed development of hypersensitivity with the onset occurring on the 5<sup>th</sup> exposure ( $**p \leq 0.01$ ; day 8); this hypersensitivity resolved in the absence of compound (day 9). Arrowheads indicate day of drug exposure ( $n = 8 - 10$  in all experimental groups).

Supplemental Figure 2

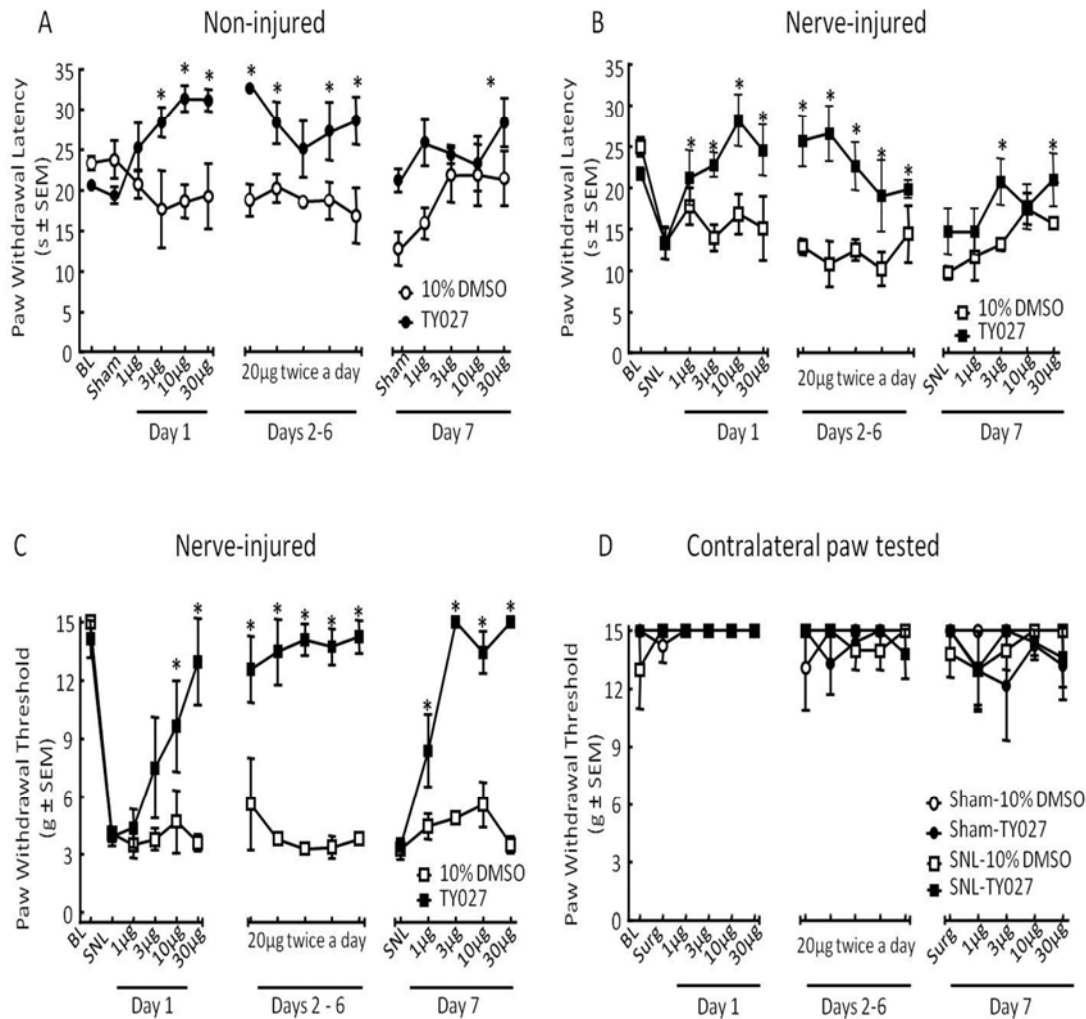

Supplemental Figure 2: Lack of tolerance *in vivo* of intrathecal TY027 in SNL and non-injured animals. Spinal TY027 was administered to rats using a cumulative dosing paradigm on days 1 and 7, while 20 µg/5µl was given twice daily on days 2 – 6. Behavioral testing occurred 30 min after injections. (A) Compared to vehicle treated animals and baseline values (day 1), TY027 retained antinociceptive activity over the 7 day time course in sham-operated (non-injured) rats with reconstruction of the dose response curve on day 7. (B) In SNL-operated rats, TY027 significantly reversed thermal hyperalgesia 30 min after spinal administration on day 1 and after seven days of chronic treatment (day 7). (C) Mechanical allodynia induced by SNL was dose-dependently attenuated following TY027 (i.t.) on day one and as

well as on day 7 after repeated administration (day 7). (D) Contralateral PWTs were not significantly changed from baseline with prolonged treatment of vehicle or TY027 in sham- or SNL operated rats. \* $p \leq 0.05$ . Data represent mean  $\pm$  SEM, n = 6 - 8 rats/treatment.

**Supplemental Table 1: *In vitro* comparison of TY027 and TY005**

| Compound ID | Affinity              |                       |                       |                       | GTP $\gamma$ S binding   |                         |                          |                         | MVD                                | GPI/LMMP                           |                                    |                                     |          | Plasma Half life (T <sub>1/2</sub> ) |
|-------------|-----------------------|-----------------------|-----------------------|-----------------------|--------------------------|-------------------------|--------------------------|-------------------------|------------------------------------|------------------------------------|------------------------------------|-------------------------------------|----------|--------------------------------------|
|             | hDOR                  | rMOR                  | hNK <sub>1</sub>      | rNK <sub>1</sub>      | hDOR                     |                         | rMOR                     |                         | Opioid ( $\delta$ )                | Opioid ( $\mu$ )                   | Substance P                        |                                     |          |                                      |
|             | (K <sub>i</sub> ; nM) | EC <sub>50</sub><br>(nM) | E <sub>max</sub><br>(%) | EC <sub>50</sub><br>(nM) | E <sub>max</sub><br>(%) | Agonist<br>(IC <sub>50</sub> ; nM) | Agonist<br>(IC <sub>50</sub> ; nM) | Agonist<br>(IC <sub>50</sub> ; nM) | Antagonist<br>(K <sub>e</sub> ; nM) |          |                                      |
| TY005       | 2.8                   | 36.3                  | 0.082                 | 0.29                  | 2.9                      | 47.6                    | 31.6                     | 45.6                    | 22.3                               | 358.8                              | None                               | 24.7                                | 0.83 min |                                      |
| TY027       | 0.66                  | 15.7                  | 0.0064                | 7.27                  | 8.6                      | 58.0                    | 7.0                      | 55.0                    | 14.5                               | 487.9                              | None                               | 10                                  | 4.83 h   |                                      |

Binding affinities and *in vitro* activities for both compounds, as well as the plasma half-life (T<sub>1/2</sub>) for TY027, are published (Yamamoto et al., 2007; 2009). To determine T<sub>1/2</sub>, peptides were incubated in rat plasma at 37 °C. Aliquots were withdrawn at multiple time points then analyzed by HPLC to determine the concentration of remaining peptide.
